# Supplementary material for: Human social conditions predict the risk of exposure to zoonotic parasites in companion animals in East and Southeast Asia
Source: PubMed Central journal article supplement (PMC9666534; doi:10.1038/s43856-022-00210-8), 2022-11-15

## Supporting information

### **Human social conditions predict the risk of exposure to zoonotic parasites in companion animals in East and Southeast Asia**

Vito Colella, Phrutsamon Wongnak, Yi-Lun Tsai, Viet L. Nguyen, Do Y. Tan, Na Lu, Fang Fang, Yin Zhijuan, Jiangwei Wang, Xin Liu, Xinghui Chen, Junyan Dong, Wisnu Nurcahyo, Upik K. Hadi, Virginia Venturina, Kenneth B.Y. Tong, Piyanan Taweethavonsawat, Saruda Tiwananthagorn, Thong Q. Le, Khanh L. Bui, Malaika Watanabe, Puteri A.M.A. Rani, Rebecca J Traub, Frédéric Beugnet, Karine Chalvet-Monfray, Lénaïg Halos

**Supplementary Table 1.** Number of dogs and cats participated in the study, classified by city.

| <b>Country</b> | <b>City</b>  | <b>Cats</b> | <b>Dogs</b> | <b>Dogs and Cats</b> |
|----------------|--------------|-------------|-------------|----------------------|
| Mainland China | Beijing      | 121         | 119         | 240                  |
|                | Nanjing      | 120         | 120         | 240                  |
|                | Nanning      | 129         | 122         | 251                  |
|                | Shanghai     | 120         | 120         | 240                  |
| Taiwan         | Pingtung     | 54          | 132         | 186                  |
| Indonesia      | Bogor        | 45          | 57          | 102                  |
|                | Yogyakarta   | 33          | 38          | 71                   |
| Malaysia       | Selangor     | 46          | 45          | 91                   |
| Philippines    | Nueva Ecija  | 115         | 120         | 235                  |
| Singapore      | Singapore    | 129         | 116         | 245                  |
| Thailand       | Bangkok      | 60          | 60          | 120                  |
|                | Chiang Mai   | 60          | 60          | 120                  |
| Vietnam        | Hanoi        | 60          | 60          | 120                  |
|                | Ho Chi Minh  | 60          | 60          | 120                  |
| <b>Total</b>   | <b>Total</b> | <b>1152</b> | <b>1229</b> | <b>2381</b>          |

**Supplementary Table 2.** Occurrence of pathogens in client-owned animals (dogs and cats) in East and South-East Asia by country and city

| <b>Country</b> | <b>City</b> | <b>All parasites</b> | <b>Ectoparasites</b> | <b>Vector-borne pathogens</b> | <b>Endoparasites</b> |
|----------------|-------------|----------------------|----------------------|-------------------------------|----------------------|
| Mainland China | Beijing     | 31.9 [26.1; 38.3]    | 17.9 [13.3; 23.4]    | 6.67 [3.86; 10.6]             | 9.66 [6.23; 14.1]    |
|                | Nanjing     | 27.5 [22.0; 33.6]    | 3.75 [1.73; 7.00]    | 5.42 [2.92; 9.08]             | 20.0 [15.1; 25.6]    |
|                | Nanning     | 20.7 [15.8; 26.3]    | 15.5 [11.3; 20.6]    | 4.88 [2.55; 8.37]             | 4.78 [2.49; 8.20]    |
|                | Shanghai    | 14.2 [10.0; 19.2]    | 7.50 [4.51; 11.6]    | 0.00 [0.00; 1.53]             | 7.08 [4.18; 11.1]    |
| Taiwan         | Pingtung    | 34.8 [27.5; 42.6]    | 22.0 [16.3; 28.7]    | 12.7 [7.91; 18.9]             | 5.03 [2.32; 9.33]    |
| Indonesia      | Bogor       | 73.7 [63.9; 82.1]    | 64.7 [54.6; 73.9]    | 24.7 [15.8; 35.5]             | 2.00 [0.24; 7.04]    |
|                | Yogyakarta  | 94.4 [86.2; 98.4]    | 81.7 [70.7; 89.9]    | 32.1 [20.3; 46.0]             | 31.0 [20.5; 43.1]    |
| Malaysia       | Selangor    | 69.2 [58.7; 78.5]    | 49.5 [38.8; 60.1]    | 13.2 [7.00; 21.9]             | 16.5 [9.53; 25.7]    |
| Philippines    | Nueva Ecija | 81.4 [75.8; 86.2]    | 75.7 [69.7; 81.1]    | 31.8 [25.7; 38.4]             | 24.8 [19.4; 30.8]    |
| Singapore      | Singapore   | 36.2 [30.2; 42.6]    | 32.7 [26.8; 38.9]    | 4.53 [2.28; 7.96]             | 4.08 [1.97; 7.38]    |
| Thailand       | Bangkok     | 47.1 [37.8; 56.4]    | 6.67 [2.92; 12.7]    | 35.0 [26.5; 44.2]             | 10.1 [5.32; 17.0]    |
|                | Chiang Mai  | 64.9 [55.4; 73.6]    | 49.2 [39.9; 58.4]    | 21.2 [14.2; 29.7]             | 17.0 [10.2; 25.8]    |
| Vietnam        | Hanoi       | 61.2 [51.7; 70.1]    | 35.0 [26.5; 44.2]    | 11.8 [6.45; 19.4]             | 26.5 [18.8; 35.5]    |
|                | Ho Chi Minh | 70.0 [61.0; 78.0]    | 51.7 [42.4; 60.9]    | 22.5 [15.4; 31.0]             | 33.3 [25.0; 42.5]    |

**Supplementary Table 3.** Summary of bioclimatic and socio-economic variables by city

| Country/Territory | City        | Annual mean temperature (°C) | Annual precipitation (mm) | 2019 Human density (per km <sup>2</sup> ) | 2017 Life expectancy (years) | Pet-Human ratio |
|-------------------|-------------|------------------------------|---------------------------|-------------------------------------------|------------------------------|-----------------|
| Mainland China    | Beijing     | 12.0                         | 607                       | 28203.8                                   | 76.5                         | 0.0368          |
|                   | Nanjing     | 15.6                         | 998                       | 16096.2                                   |                              |                 |
|                   | Nanning     | 22.3                         | 1381                      | 8366.4                                    |                              |                 |
|                   | Shanghai    | 16.2                         | 1066                      | 34871.0                                   |                              |                 |
| Taiwan            | Pingtung    | 23.8                         | 2743                      | 657.6                                     | 80.1                         | 0.1032          |
| Indonesia         | Bogor       | 25.5                         | 3791                      | 7261.2                                    | 71.3                         | 0.0100          |
|                   | Yogyakarta  | 26.0                         | 2165                      | 5289.3                                    |                              |                 |
| Malaysia          | Selangor    | 27.0                         | 2374                      | 4078.0                                    | 75.8                         | 0.0370          |
| The Philippines   | Nueva Ecija | 27.1                         | 1850                      | 1410.8                                    | 70.9                         | 0.1626          |
| Singapore         | Singapore   | 27.0                         | 2514                      | 8452.5                                    | 83.3                         | 0.0341          |
| Thailand          | Bangkok     | 28.0                         | 1464                      | 15428.0                                   | 76.7                         | 0.1634          |
|                   | Chiang Mai  | 25.0                         | 1119                      | 1731.5                                    |                              |                 |
| Vietnam           | Hanoi       | 23.9                         | 1687                      | 12260.9                                   | 75.2                         | 0.0973          |
|                   | Ho Chi Minh | 27.5                         | 1818                      | 23878.1                                   |                              |                 |

**Supplementary Table 4.** The Akaike information criterion (AIC) and the area under the receiver operating characteristic (ROC) curve for the model selection.

| Parasite              | Model                                                                     | Description                                                                 | AIC            | Area under ROC curve |
|-----------------------|---------------------------------------------------------------------------|-----------------------------------------------------------------------------|----------------|----------------------|
| All parasites         | A0                                                                        | Null                                                                        | 2544.08        | 0.7614               |
|                       | A1                                                                        | AgeCl                                                                       | 2534.80        | 0.7686               |
|                       | A2                                                                        | AgeCl + Neut                                                                | 2519.28        | 0.7723               |
|                       | A3                                                                        | AgeCl + Neut + Envi                                                         | 2479.83        | 0.7830               |
|                       | A4                                                                        | AgeCl + Neut + Envi + LifeEx                                                | 2476.99        | 0.7828               |
|                       | <b>A5</b>                                                                 | <b>AgeCl + Neut + Envi + LifeEx + Temp</b>                                  | <b>2467.71</b> | <b>0.7826</b>        |
|                       | A6                                                                        | AgeCl + Neut + Envi + LifeEx + Temp + <i>Prec</i> *                         | 2465.41*       | 0.7829               |
|                       | A7                                                                        | AgeCl + Neut + Envi + LifeEx + Temp + <i>Spec</i>                           | 2469.68        | 0.7817               |
|                       | A8                                                                        | AgeCl + Neut + Envi + LifeEx + Temp + <i>PHratio</i>                        | 2469.69        | 0.7826               |
|                       | A9                                                                        | AgeCl + Neut + Envi + LifeEx + Temp + <i>House</i> *                        | 2467.62*       | 0.7827               |
|                       | A10                                                                       | AgeCl + Neut + Envi + LifeEx + Temp + <i>Sex</i>                            | 2469.15        | 0.7834               |
| A11                   | AgeCl + Neut + Envi + LifeEx + Temp + <i>PopDens</i>                      | 2469.56                                                                     | 0.7823         |                      |
| Vectorborne pathogens | B0                                                                        | Null                                                                        | 1428.10        | 0.7370               |
|                       | B1                                                                        | <i>Spec</i>                                                                 | 1166.15        | 0.6585               |
|                       | B2                                                                        | <i>Spec</i> + <i>House</i>                                                  | 1152.89        | 0.6582               |
|                       | B3                                                                        | <i>Spec</i> + <i>House</i> + <i>LifeEx</i>                                  | 1151.43        | 0.6585               |
|                       | <b>B4</b>                                                                 | <b><i>Spec</i> + <i>House</i> + <i>LifeEx</i> + <i>Temp</i></b>             | <b>1144.61</b> | <b>0.6585</b>        |
|                       | B5                                                                        | <i>Spec</i> + <i>House</i> + <i>LifeEx</i> + <i>Temp</i> + <i>PHratio</i> * | 1143.64*       | 0.6536               |
|                       | B6                                                                        | <i>Spec</i> + <i>House</i> + <i>LifeEx</i> + <i>Temp</i> + <i>Prec</i>      | 1146.31        | 0.6571               |
|                       | B7                                                                        | <i>Spec</i> + <i>House</i> + <i>LifeEx</i> + <i>Temp</i> + <i>AgeCl</i>     | 1145.47        | 0.6549               |
|                       | B8                                                                        | <i>Spec</i> + <i>House</i> + <i>LifeEx</i> + <i>Temp</i> + <i>Neut</i>      | 1145.57        | 0.6606               |
|                       | B9                                                                        | <i>Spec</i> + <i>House</i> + <i>LifeEx</i> + <i>Temp</i> + <i>Sex</i>       | 1146.35        | 0.6592               |
| B10                   | <i>Spec</i> + <i>House</i> + <i>LifeEx</i> + <i>Temp</i> + <i>PopDens</i> | 1146.44                                                                     | 0.6585         |                      |

\*Indicates the non-significant variables that reduce the AIC value; Bolded rows indicated the selected models for describing risk indicators.

**Supplementary Table 5.** The Akaike information criterion (AIC) and the area under the receiver operating characteristic (ROC) curve for the model selection (cont.).

| Parasite      | Model     | Description                          | AIC           | Area under ROC curve |
|---------------|-----------|--------------------------------------|---------------|----------------------|
| Ectoparasites | C0        | Null                                 | 2224.0        | 0.79830              |
|               | C1        | Neut                                 | 2205.9        | 0.80519              |
|               | C2        | Neut + Envi                          | 2151.3        | 0.81708              |
|               | <b>C3</b> | <b>Neut + Envi + Prec</b>            | <b>2133.2</b> | <b>0.81880</b>       |
|               | C4        | Neut + Envi + Prec + Temp            | 2133.9        | 0.81838              |
|               | C5        | Neut + Envi + Prec + <i>LifeEx</i> * | 2131.6*       | 0.81794              |
|               | C6        | Neut + Envi + Prec + <i>AgeCl</i> *  | 2131.0*       | 0.81967              |
|               | C7        | Neut + Envi + Prec + House           | 2134.2        | 0.81831              |
|               | C8        | Neut + Envi + Prec + PHratio         | 2134.6        | 0.81798              |
|               | C9        | Neut + Envi + Prec + Spec            | 2134.8        | 0.81915              |
|               | C10       | Neut + Envi + Prec + Sex             | 2135.2        | 0.81897              |
|               | C11       | Neut + Envi + Prec + PopDens         | 2134.7        | 0.8189               |
| Endoparasites | D0        | Null                                 | 1549.1        | 0.72677              |
|               | <b>D1</b> | <b>AgeCl</b>                         | <b>1537.6</b> | <b>0.73752</b>       |
|               | D2        | AgeCl + <i>LifeEx</i> *              | 1537.1*       | 0.73598              |
|               | D3        | AgeCl + House                        | 1539.5        | 0.73652              |
|               | D4        | AgeCl + Envi                         | 1539.4        | 0.73732              |
|               | D5        | AgeCl + Spec                         | 1539.3        | 0.73501              |
|               | D6        | AgeCl + Neut                         | 1537.7        | 0.74038              |
|               | D7        | AgeCl + PHratio                      | 1538.9        | 0.73708              |
|               | D8        | AgeCl + Temp                         | 1539.5        | 0.73749              |
|               | D9        | AgeCl + Prec                         | 1538.9        | 0.73705              |
|               | D10       | AgeCl + <i>Sex</i> *                 | 1536.1*       | 0.74157              |
|               | D11       | AgeCl + PopDens                      | 1539.6        | 0.73759              |

\*Indicates the non-significant variables that reduce the AIC value; Bolded rows indicated the selected models for describing risk indicators.

**Supplementary Table 6.** The Akaike information criterion (AIC) and the area under the receiver operating characteristic (ROC) curve for the model selection (cont.).

| Parasite               | Model                                 | Description                           | AIC            | Area under ROC curve |
|------------------------|---------------------------------------|---------------------------------------|----------------|----------------------|
| <i>Ancylostoma</i> sp. | E0                                    | Null                                  | 1042.15        | 0.78878              |
|                        | E1                                    | AgeCl                                 | 1037.59        | 0.79238              |
|                        | <b>E2</b>                             | <b>AgeCl + Spec</b>                   | <b>1031.66</b> | <b>0.79849</b>       |
|                        | E3                                    | AgeCl + Spec + LifeEx*                | 1030.84*       | 0.79736              |
|                        | E4                                    | AgeCl + Spec + House                  | 1032.08        | 0.80133              |
|                        | E5                                    | AgeCl + Spec + Envi                   | 1033.50        | 0.79832              |
|                        | E6                                    | AgeCl + Spec + Neut*                  | 1031.53*       | 0.80209              |
|                        | E7                                    | AgeCl + Spec + PHratio                | 1032.24        | 0.79826              |
|                        | E8                                    | AgeCl + Spec + Temp                   | 1032.70        | 0.79858              |
|                        | E9                                    | AgeCl + Spec + Prec                   | 1033.46        | 0.79872              |
|                        | E10                                   | AgeCl + Spec + Sex                    | 1031.79        | 0.80217              |
| E11                    | AgeCl + Spec + PopDens                | 1032.91                               | 0.79842        |                      |
| Ticks                  | F0                                    | Null                                  | 1377.14        | 0.83532              |
|                        | F1                                    | Spec                                  | 1175.99        | 0.89536              |
|                        | F2                                    | Spec + Envi                           | 1145.93        | 0.90253              |
|                        | F3                                    | Spec + Envi + LifeEx                  | 1145.08        | 0.90066              |
|                        | <b>F4</b>                             | <b>Spec + Envi + LifeEx + Temp</b>    | <b>1138.47</b> | <b>0.90270</b>       |
|                        | F5                                    | Spec + Envi + LifeEx + Temp + Neut*   | 1137.50*       | 0.90167              |
|                        | F6                                    | Spec + Envi + LifeEx + Temp + Prec    | 1140.08        | 0.90293              |
|                        | F7                                    | Spec + Envi + LifeEx + Temp + PHratio | 1139.55        | 0.90187              |
|                        | F8                                    | Spec + Envi + LifeEx + Temp + AgeCl   | 1140.46        | 0.90291              |
|                        | F9                                    | Spec + Envi + LifeEx + Temp + Sex     | 1140.26        | 0.90219              |
|                        | F10                                   | Spec + Envi + LifeEx + Temp + House   | 1140.40        | 0.90263              |
| F11                    | Spec + Envi + LifeEx + Temp + PopDens | 1140.44                               | 0.90268        |                      |

\*Indicates the non-significant variables that reduce the AIC value; Bolded rows indicated the selected models for describing risk indicators.

**Supplementary Table 7.** The Akaike information criterion (AIC) and the area under the receiver operating characteristic (ROC) curve for the model selection (cont.).

| Parasite | Model                                                | Description                                           | AIC            | Area under ROC curve |
|----------|------------------------------------------------------|-------------------------------------------------------|----------------|----------------------|
| Fleas    | G0                                                   | Null                                                  | 1411.56        | 0.86283              |
|          | G1                                                   | Spec                                                  | 1400.11        | 0.86817              |
|          | G2                                                   | Spec + Envi                                           | 1365.60        | 0.86976              |
|          | G3                                                   | Spec + Envi + LifeEx                                  | 1362.10        | 0.86942              |
|          | G4                                                   | Spec + Envi + LifeEx + Neut                           | 1359.43        | 0.87289              |
|          | G5                                                   | Spec + Envi + LifeEx + Neut + AgeCl                   | 1357.50        | 0.87476              |
|          | <b>G6</b>                                            | <b>Spec + Envi + LifeEx + Neut + AgeCl + Prec</b>     | <b>1351.18</b> | <b>0.87650</b>       |
|          | G7                                                   | Spec + Envi + LifeEx + Neut + AgeCl + Prec + PHratio* | 1350.75*       | 0.87588              |
|          | G8                                                   | Spec + Envi + LifeEx + Neut + AgeCl + Prec + Temp     | 1352.73        | 0.87586              |
|          | G9                                                   | Spec + Envi + LifeEx + Neut + AgeCl + Prec + Sex      | 1352.17        | 0.87634              |
|          | G10                                                  | Spec + Envi + LifeEx + Neut + AgeCl + Prec + House    | 1352.52        | 0.87538              |
| G11      | Spec + Envi + LifeEx + Neut + AgeCl + Prec + PopDens | 1351.42                                               | 0.87599        |                      |

\*Indicates the non-significant variables that reduce the AIC value; Bolded rows indicated the selected models for describing risk indicators.

**Supplementary Figure 1.** Geographical distribution of parasites detected in dog (A) and cat (B) populations from 14 cities of East and South-East Asia.

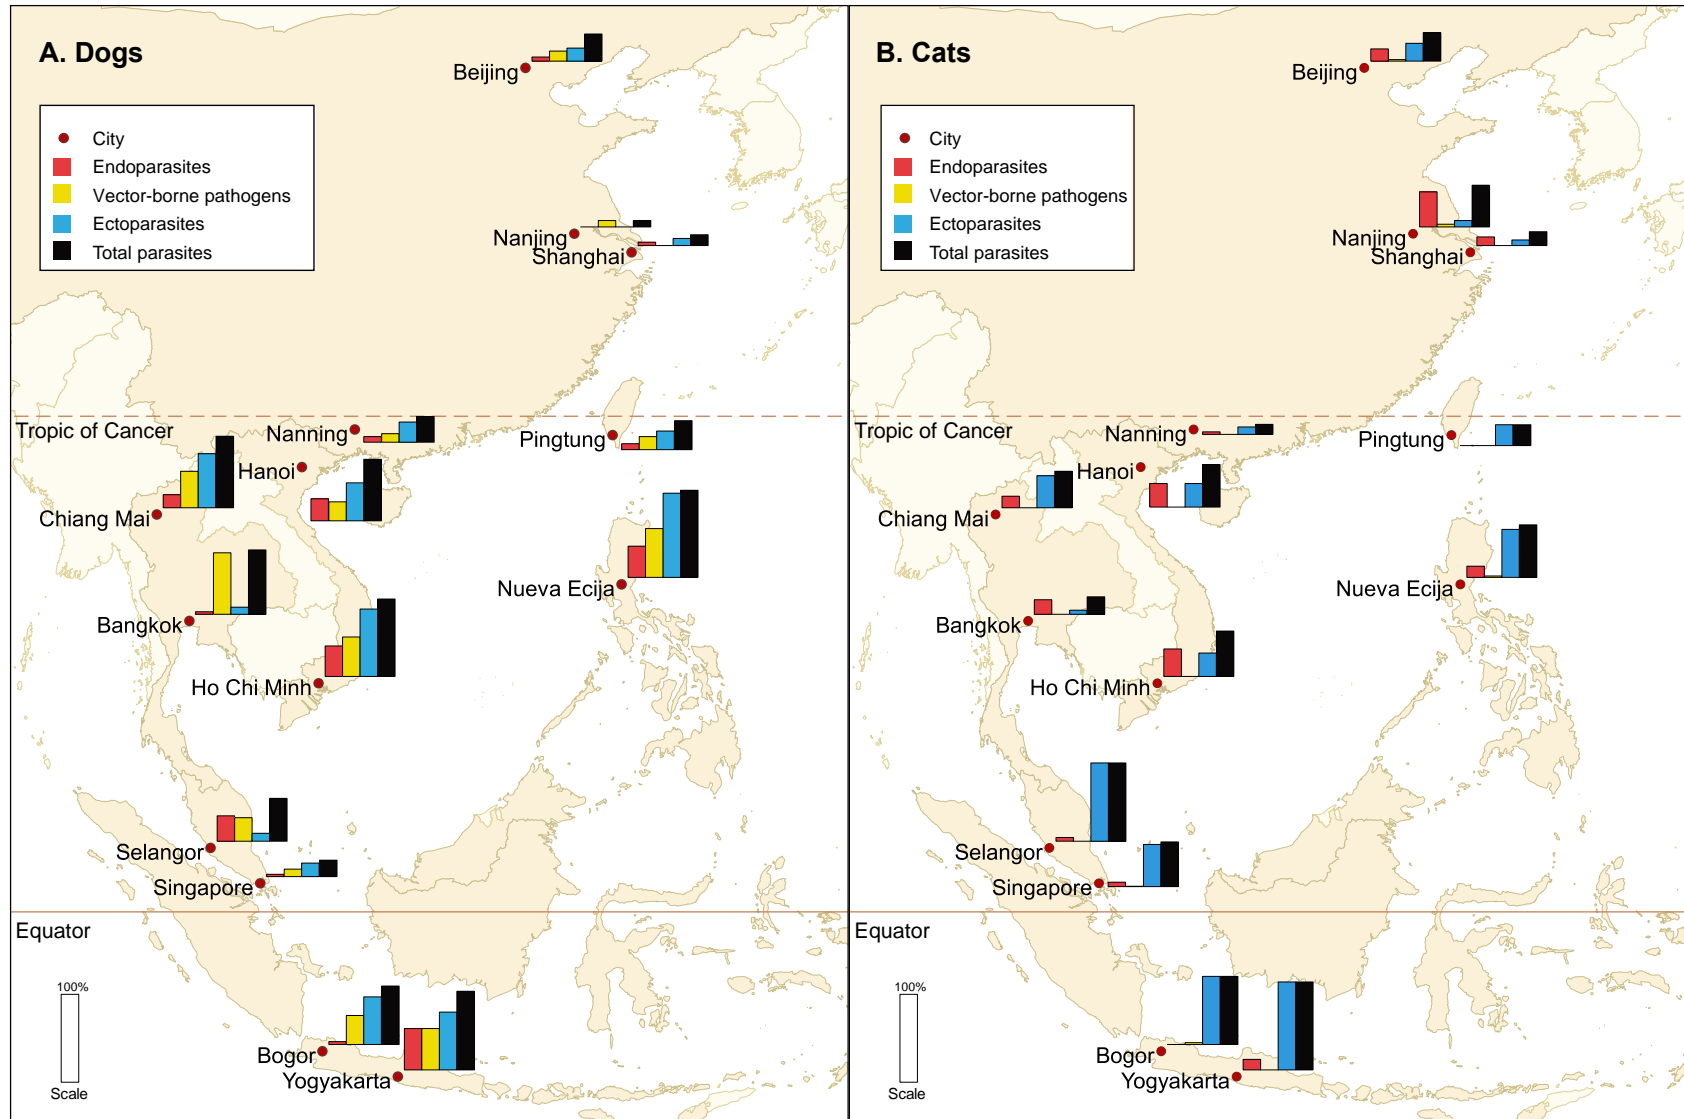



**Supplementary Figure 2.** Pairwise association between potential risk factors and infection statuses. All variables were treated as categorical variables as: Species (dog and cat); Age (young: < 5 years, adult: 5 to 15 years, old: > 15 years); Sex (M: male, F: female); Neuter (Y: yes, N: no); Environment (RA: rural area, UA: urban area); Average annual temperature (low:  $\leq 24$  °C, high:  $> 24$  °C); Annual precipitation (low:  $\leq 2000$  mm, high:  $> 2000$  mm); Population density (low:  $\leq 10000$  per km<sup>2</sup>,  $> 10000$  per km<sup>2</sup>); Pet-human ratio (low:  $\leq 0.05$ , high  $> 0.05$ ); Life expectancy (low:  $\leq 76$  years, high:  $> 76$  years). Infestation status for all parasites were denoted using 1 as infected and 0 as not infected. Colours represent the value of Cramér's V statistics with asterisks indicating the Cramér's V value greater than 0.3.

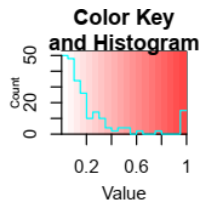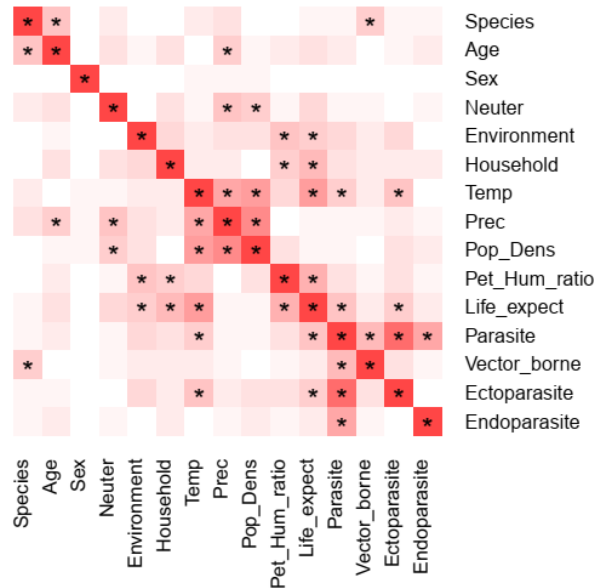

Supplement: 43856_2022_210_MOESM3_ESM.pdf [file 43856_2022_210_MOESM3_ESM.pdf]
