# Supplementary material for: Human social conditions predict the risk of exposure to zoonotic parasites in companion animals in East and Southeast Asia
Source: PubMed Central journal article supplement (PMC9666534; doi:10.1038/s43856-022-00210-8), 2022-11-15
Supplement: 43856_2022_210_MOESM4_ESM.pdf [file 43856_2022_210_MOESM4_ESM.pdf]

## Description of Additional Supplementary Files

**Supplementary Data 1.** Data of ectoparasites, endoparasites, and vector-borne pathogens of dogs and cats in East and Southeast Asia.

**Supplementary Data 2.** Animal characteristics, bioclimatic, husbandry, and socioeconomic factors related to the infection with ectoparasites, endoparasites, and vector-borne pathogens of dogs and cats in East and Southeast Asia.
